# Supplementary material for: Ancestry Analysis in the 11-M Madrid Bomb Attack Investigation
Source: PLoS One. 2009 Aug 11;4(8):e6583. doi: 10.1371/journal.pone.0006583 (PMC2719087; doi:10.1371/journal.pone.0006583)
Supplement: Table S6 — Classification error estimations for combinations of four autosomal AIM-SNP sets using CEPH-HGDP samples as training sets. (0.03 MB XLS) [file pone.0006583.s007.xls]

## Sheet: Classification error AIM-SNPs
1. Reclassification analysis of 34plex SNPs vs 34plex + supplementary SNP sets								2. Reclassification analysis of 34plex SNPs vs 34plex + Eurasia-informative SNP set						3. Cross validation analysis of 34plex SNPs vs 34plex + Eurasia-informative SNP set
34plex, 3 groups	classified as:	African	European	East Asian				34plex	classified as:	European	Mozabite			34plex		EUR	MOZ
	CEPH Africans	100							CEPH Europeans	99.12	0.88				EUR	90.27	9.73
	CEPH Europeans		99.37	0.63					CEPH Mozabites		100				MOZ		100
	CEPH East Asians			100
								34plex + Eurasia-informative 28plex		EUR	MOZ			34plex + Eurasia-informative 28plex		EUR	MOZ
34plex, 4 groups		AFR	EUR	E ASN	American				EUR	100					EUR	89.38	10.61
	AFR	100							MOZ		100				MOZ		100
	EUR		98.73	0.63	0.63
	E ASN			93.89	6.11
	CEPH Americans				100
								34plex		EUR	MOZ	South Asian		34plex		EUR	MOZ	S ASN
34plex, 5 groups		AFR	EUR	E ASN	AME	Oceanian			EUR	97.35	0.88	1.77			EUR	84.96	3.54	11.5
	AFR	100							MOZ		89.66	10.34			MOZ		62.07	37.93
	EUR		98.73	0.63					CEPH South Asians	2.5	9	88.5			S ASN		1	99
	ASN			93.45	6.11	0.44
	E ASN				100			34plex + Eurasia-informative 28plex		EUR	MOZ	S ASN		34plex + Eurasia-informative 28plex		EUR	MOZ	S ASN
	CEPH Oceanians			3.57		96.43			EUR	100					EUR	90.27	9.73
									MOZ		100				MOZ		72.41	27.59
									S ASN		1.5	98.5			S ASN			100
34plex + AME-informative 27plex		AFR	EUR	ASN	AME	OCE
	AFR	100
	EUR		99.37	0.63
	E ASN			99.56	0.44
	AME				100
	OCE					100
34plex + OCE-informative 28plex		AFR	EUR	ASN	AME	OCE
	AFR	100
	EUR		100
	ASN			96.07	3.93
	AME				100
	OCE					100
34plex + AME + OCE-informative sets		AFR	EUR	ASN	AME	OCE
	AFR	100
	EUR		100
	ASN			100
	AME				100
	OCE					100
